# Supplementary material for: Fabrication of multiphase MoSe2 modified BiOCl nanosheets for efficient piezo-photoelectric hydrogen evolution and antibiotic degradation
Source: Royal Society of Chemistry journal article supplement (doi:10.1039/d3dt02153j), 2023-01-01
Supplement: d3dt02153j1.pdf [file d3dt02153j1.pdf]

### Electronic Supplementary Information

#### **Fabrication of multiphase MoSe<sub>2</sub> modified BiOCl nanosheets for efficient piezo-photoelectric hydrogen evolution and antibiotics degradation**

Mianmian Wu, Nan Li\*, Minghao Shi, Guifang Sun, Wenjing Shen, Qingfei Li and Jiangquan Ma\*

*Jiangsu Province Advanced Catalysis and Green Manufacturing Collaborative Innovation Center, Changzhou University, Changzhou, Jiangsu Province 213164, China.*

\*Correspondence to authors.

*E-mail addresses:* 1548833493@qq.com (N. Li), majiangquan@126.com (J. Ma).

## 1. EXPERIMENTAL SECTION

### 1.1 Materials

Sodium molybdate ( $\text{Na}_2\text{MoO}_4 \cdot 2\text{H}_2\text{O}$ , 99%), selenium powder (Se, 99%), sodium borohydride ( $\text{NaBH}_4$ , 99%), bismuth nitrate pentahydrate ( $\text{Bi}(\text{NO}_3)_3 \cdot 5\text{H}_2\text{O}$ , 99%), dioctadecyl dimethyl ammonium chloride (DODAC, 99%), Diclofenac sodium (DCF) and lactic acid were obtained from Sinopharm Chemical Reagent Co.

### 1.2 Synthesis of 1T/2H $\text{MoSe}_2$

The  $\text{NaBH}_4$  (0.304 g) and Se (0.316 g) were dissolved in 75 mL water, and then 0.484 g  $\text{Na}_2\text{MoO}_4$  was added and stirred for 20 min to form a homogeneous liquid. The above solution was moved to a 100 mL hydrothermal synthesis reactor and heated to 220 °C for 20 h. After being cooled to room temperature, the black precipitate was gathered and washed several times with deionized water and ethanol. Dried overnight in a vacuum drying oven to acquire the final product.

### 1.3 Synthesis of 2H $\text{MoSe}_2$

The above obtained 1T/2H  $\text{MoSe}_2$  catalyst was put into a tube furnace, nitrogen was passed and heated to 600 °C at a heating rate of 5 °C  $\text{min}^{-1}$  for 2 h to obtain the product.

### 1.4 Synthesis of $\text{BiOCl}$

First, a quantity of  $\text{Bi}(\text{NO}_3)_3 \cdot 5\text{H}_2\text{O}$  and 3 mL of concentrated nitric acid were dispersed in 40 mL of deionized water under intense stirring to obtain a clear solution. Then the above  $\text{Bi}(\text{NO}_3)_3$  solution was added to the already dissolved dioctadecyl dimethyl ammonium chloride (DODAC) solution, where the mass ratio of

DODAC to  $\text{Bi}(\text{NO}_3)_3 \cdot 5\text{H}_2\text{O}$  was 0.5. Subsequently, the suspension was stirred at room temperature for 8 h. Then, the suspension was collected by centrifugation, rinsed several times with deionized water and ethanol, and dried in vacuum at 60 °C to obtain the product.

### **1.5 Synthesis of 1T/2H MoSe<sub>2</sub>/BiOCl and 2H MoSe<sub>2</sub>/BiOCl**

Different doses (3, 5, 10 mg) of 1T/2H MoSe<sub>2</sub> and 1 g BiOCl were mixed and dispersed into anhydrous ethanol to form a homogeneous 1T/2H MS/BOC suspension under the action of ultrasound and stirring, respectively, and different mass percentages of 1T/2H MS/BOC nanosheets (0.3%, 0.5%, 1.0%) were obtained after overnight in a vacuum drying oven. The 0.5% 2H MS/BOC was prepared by weighing 5 mg 2H MoSe<sub>2</sub> and 1 g BiOCl nanosheets by the similar method.

### **1.6 Characterization**

The crystalline structure of the catalyst was examined by X-ray diffraction (XRD) technique (Japan/D/MAX2500). The morphology and element distribution of samples were determined by a scanning electron microscope (SEM, SUPRA55). Microstructures were employing using transmission electron microscope and high-resolution transmission electron microscope (TEM, JEM-2100, Japan). The chemical elements and phase composition of the synthesized catalysts were analyzed by X-ray Photoelectron Spectroscopy (XPS, PHI-5000 VPIII). Electron spin resonance (EPR) spectrum were acquired by Bruker EMX PLUS EPR spectrometer.

### **1.7 Photoelectrochemical Measurements**

Photoelectrochemical measurements were performed using an electrochemical analyzer (DH7000, China) and a Xe lamp (220V, 35W). And H<sub>2</sub>SO<sub>4</sub> solution (0.5 mol/ L) was employed as electrolyte. Saturated calomel electrode (SCE) and graphite rod were utilized as the counter and reference electrodes, respectively. The working electrodes were prepared as follows: 5 mg of sample was added to a mixture of 0.5 mL of ethanol and water (1:3), and 20  $\mu$ L of Nafion solution (Dupont, 5 wt%) was added to the above suspension. Next, 5  $\mu$ L ink was dropped onto the surface of a polished glassy carbon electrode (GCE) and dried to form a working electrode. The linear sweep voltammetry (LSV) curves were obtained from -1 to -0.4 V at the rate of 5 mV·s<sup>-1</sup>. The electrochemical double layer capacitance (C<sub>dl</sub>) was measured by cyclic voltammetry (CV). Electrochemical impedance spectroscopy (EIS) was measured at the open-circuit potential with a fixed frequency range of 10<sup>-2</sup> to 10<sup>5</sup> Hz.

### **1.8 Piezo-photodegradation DCF**

Firstly, 20 mg piezo-photocatalyst was added to DCF solution (10 mg/L, 60 mL) and stirred in the dark for half an hour to reach adsorption-desorption equilibrium. Then the xenon lamp (220 V, 35 W) and ultrasonic washing device (240 W, 40 kHz) were opened for the catalytic reaction. An aliquot of 1 mL aliquots was drawn every 10 min and then filtered through a 0.22  $\mu$ m membrane for the next analysis.

### **1.9 HPLC Analysis Method**

The model of the chromatographic column was SB-C18, and the wavelength of the UV detector was set to 276 nm. Methanol and 0.5% acetic acid (80/20, V/V) were selected as the mobile phases with a flow rate of 1.0 mL·min<sup>-1</sup> and an injection

volume of 20  $\mu\text{L}$ . The intermediate products/by-products of DCF piezoelectric degradation were determined by ZORBAX Eclipse Plus C18 column and Dual AJS ESI particle source liquid chromatography mass spectrometry (Agilent 6230B). At 25  $^{\circ}\text{C}$ , the injection volume was 10  $\mu\text{L}$ , and the eluent was methanol (A) and water (B). The gradient of the eluent was 0-1 min at 10% A and 90% B, increasing to 90% A and 10% B over 5 min and held for 20 min.

#### **1.10 DFT Calculation Method.**

The Gaussian 09W software was utilized to select the DFT, B3LYP theoretical approach to study the material. The 6-31G+(d, p) basis set was selected for O, N, C, Cl geometry optimization and single-point energy calculation (6-31G+), and the Fukui function in Multiwfn software was used to predict the site of free radical attack on DCF molecules.

#### **1.11 Piezo-photocatalytic H<sub>2</sub> Evolution.**

The piezo-photocatalytic H<sub>2</sub> generation was carried out in a sealed quartz reactor (50 mL). In a typical reaction, 2 mg sample was scattered by ultrasonic in 20 mL aqueous solution containing 2 mL methanol as sacrificial agents. Before the reaction, the vessel was passed with nitrogen (N<sub>2</sub>) for 30 min. During the catalytic reaction, the temperature of the reaction liquid was kept at around 30  $^{\circ}\text{C}$  by circulating water bath. A gas chromatography (A91 Plus, Ar<sub>2</sub> as carrier gas) was chosen to analyze the generated hydrogen.

## 2. Figures

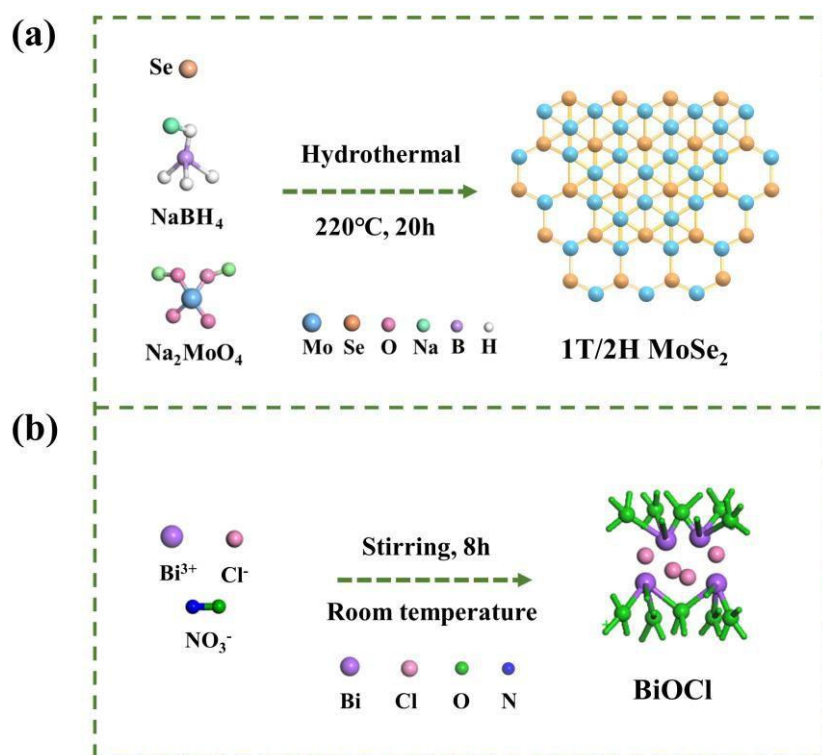

**Fig. S1** Schematic drawings illustrating the fabrication process of (a) 1T/2H MoSe<sub>2</sub> and (b) BiOCl nanosheets.

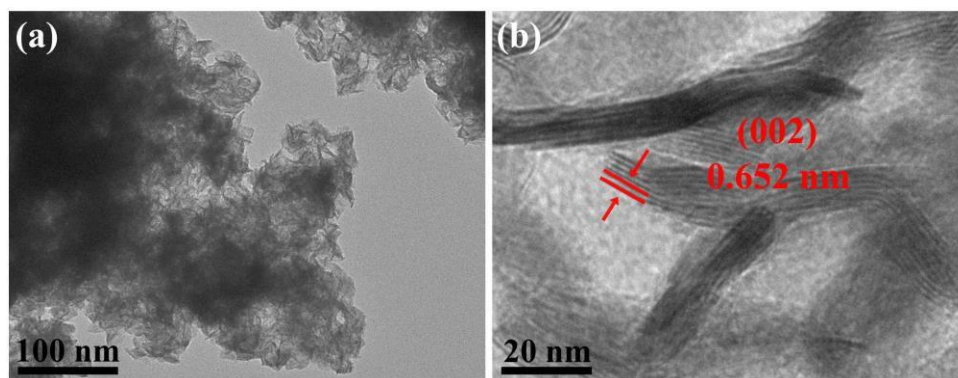

**Fig. S2** (a) TEM and (b) HRTEM images of 2H MoSe<sub>2</sub>.

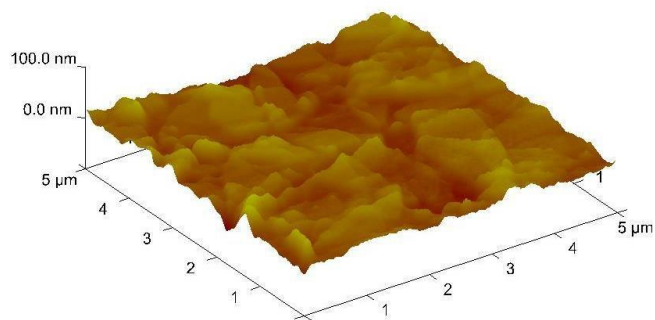

**Fig. S3** The 3D AFM image of 0.5% 1T/2H MS/BOC.

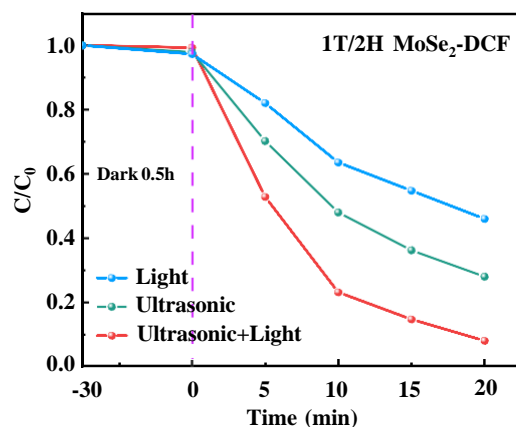

**Fig. S4** DCF degradation performance curves under different conditions of 1T/2H MoSe<sub>2</sub>.

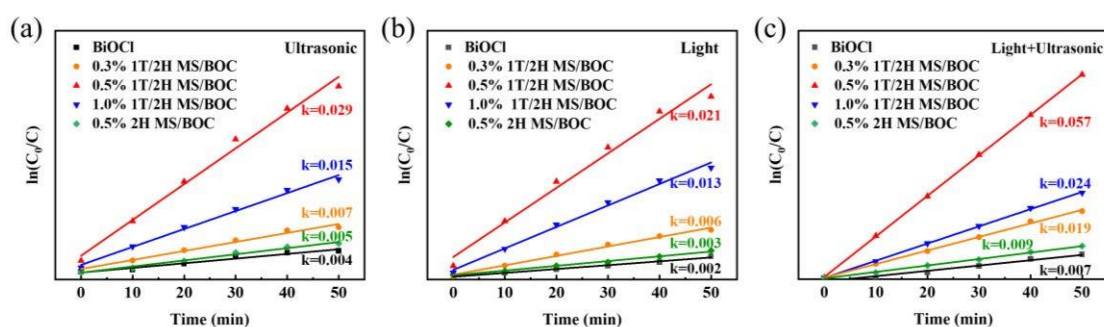

**Fig. S5** Reaction kinetics of pure BiOCl, 0.5% 2H MS/BOC and different loading ratios of 1T/2H MS/BOC under (a) ultrasonic conditions, (b) light conditions, (c) ultrasonic and light.

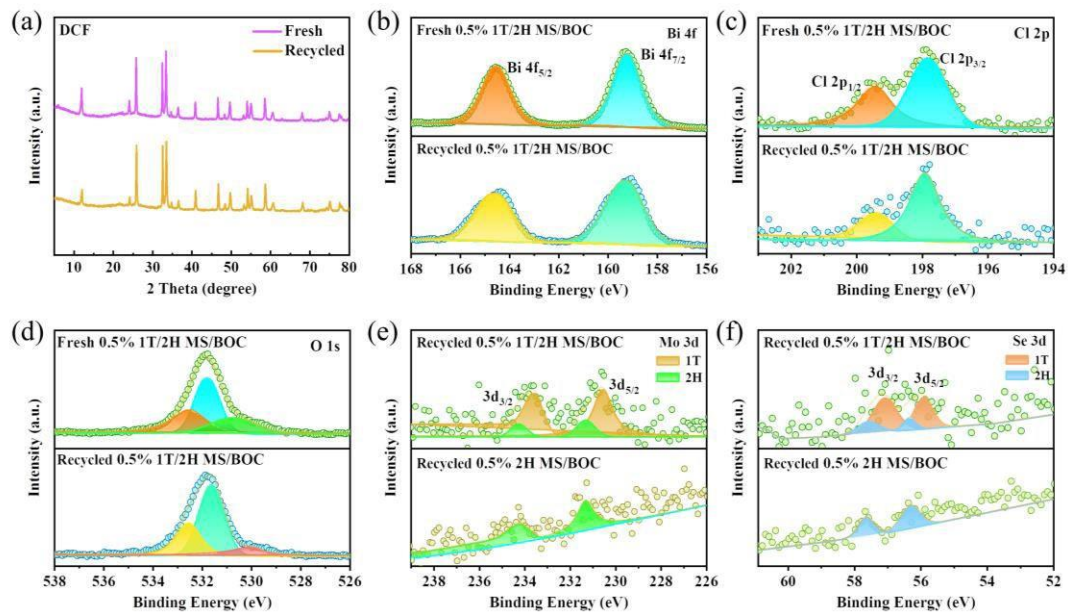

**Fig. S6** (a) XRD comparison before and after reaction of DCF degradation. XPS spectra of fresh and recycled 0.5% 1T/2H MS/BOC composite: (b) Bi 4f, (c) Cl 2p, (d) O 1s. (e) Mo 3d XPS spectra and (f) Se 3d XPS spectra after the DCF degradation reaction.

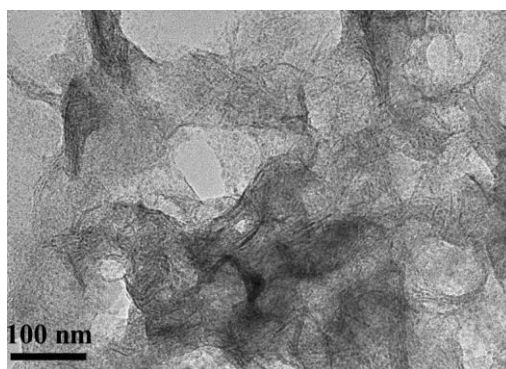

**Fig. S7** TEM after degradation of DCF by 0.5% 1T/2H MS/BOC.



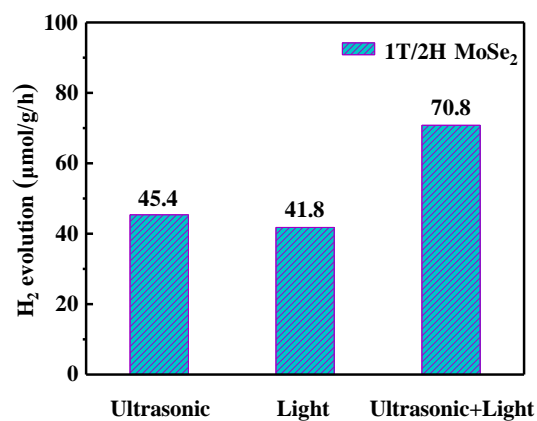

**Fig. S8** H<sub>2</sub> evolution rate plots under different conditions of 1T/2H MoSe<sub>2</sub>.

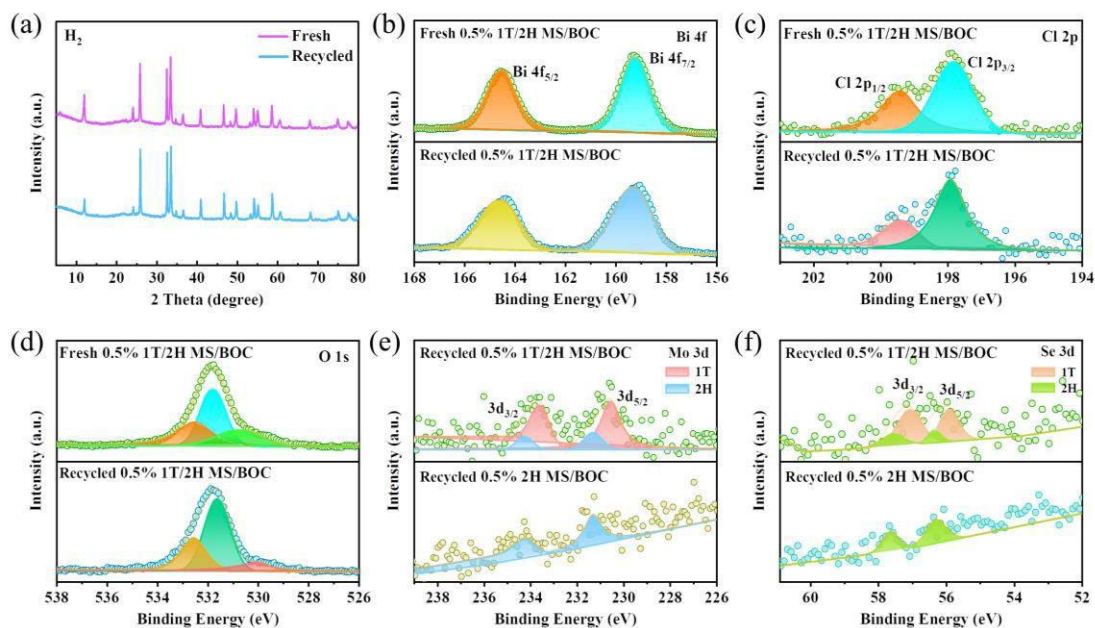

**Fig. S9** (a) XRD comparison before and after reaction of H<sub>2</sub> evolution. XPS spectra of fresh and recycled 0.5% 1T/2H MS/BOC composite: (b) Bi 4f, (c) Cl 2p, (d) O 1s. (e) Mo 3d XPS spectra and (f) Se 3d XPS spectra after the H<sub>2</sub> evolution reaction.

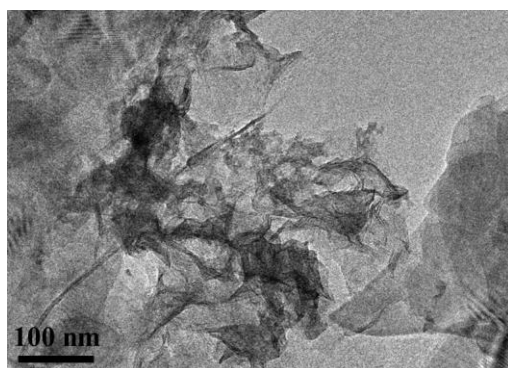

**Fig. S10** TEM after H<sub>2</sub> evolution by 0.5% 1T/2H MS/BOC.

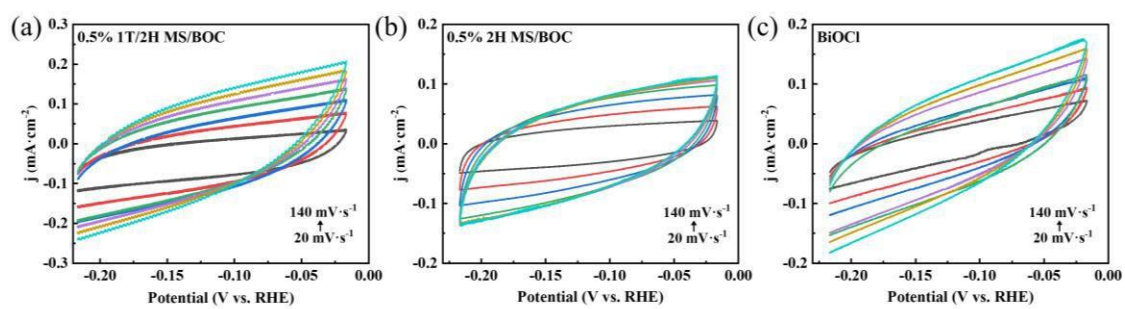

**Fig. S11** CV tests of as-synthesized (a) 0.5% 1T/2H MS/BOC, (b) 0.5% 2H MS/BOC and (c) BiOCl samples at varied scan rates.

### 3. Table

**Table S1** Comparison of piezo-photocatalytic performances for dye degradation and H<sub>2</sub> evolution of catalyst reported previously and in this work.

| Catalyst                                                                               | Pollutant  | Concentration and volumetric of pollutant (mg/L, mL) | Catalyst dosage (mg) | Degradation efficiency and time (% , min) | H <sub>2</sub> evolution rate (μmol/g/h) | Ref.             |
|----------------------------------------------------------------------------------------|------------|------------------------------------------------------|----------------------|-------------------------------------------|------------------------------------------|------------------|
| TB450                                                                                  | DCF        | 10, 60                                               | 15                   | 99, 90                                    | /                                        | S1               |
| SFB-15                                                                                 | DCF        | 10, 50                                               | 15                   | 98, 90                                    | /                                        | S2               |
| 40-BOC/CBO                                                                             | DCF        | 50, 40                                               | 20                   | 90, 60                                    | /                                        | S3               |
| rGO-CBS (15%)                                                                          | DCF        | 10, 50                                               | 30                   | 85, 60                                    | /                                        | S4               |
| BiOBr                                                                                  | RhB        | 10, 50                                               | 50                   | 99, 120                                   | /                                        | S5               |
| 0.15 BiOI/ZnO NRs                                                                      | BPA        | 10, 50                                               | 10                   | 95, 120                                   | /                                        | S6               |
| 5MoSe <sub>2</sub> /AgBr                                                               | TC         | 20, 100                                              | 50                   | 81, 90                                    | /                                        | S7               |
| B/BB/B@B-10-0.3                                                                        | CTC        | 50, 100                                              | 50                   | 95, 90                                    | /                                        | S8               |
| BiOCl(110)-PbS                                                                         | /          | /                                                    | /                    | /                                         | 16.0                                     | S9               |
| BU-BiOCl/Pt                                                                            | /          | /                                                    | /                    | /                                         | 79.2                                     | S10              |
| Pt/ZnRh <sub>2</sub> O <sub>4</sub> /Ag/Bi <sub>4</sub> V <sub>2</sub> O <sub>11</sub> | /          | /                                                    | /                    | /                                         | 0.21                                     | S11              |
| <b>0.5% 1T/2H MS/BOC</b>                                                               | <b>DCF</b> | <b>10, 60</b>                                        | <b>20</b>            | <b>94, 50</b>                             | <b>122.5</b>                             | <b>This work</b> |

## Reference

- S1 F. Liu, J. Liang, L. Chen, M. Tong, and W. Liu, *J. Mol. Liq.*, 2019, **275**, 807-814.
- S2 A. Kumar, S.K. Sharma, A. Kumar, G. Sharma, N. AlMasoud, T.S. Alomar, M. Naushad, Z.A. Alothman, and F.J. Stadler, *Journal of Cleaner Production*, 2021, **315**, 128137.
- S3 S. Wu, X. Yu, J. Zhang, Y. Zhang, Y. Zhu, and M. Zhu, *Chem. Eng. J.*, 2021, **411**, 128555.
- S4 O.C. Olatunde, and D.C. Onwudiwe, *Results in Chemistry*, 2022, **4**, 100273.
- S5 H. Lei, H. Zhang, Y. Zou, X. Dong, Y. Jia, and F. Wang, *J. Alloys Compd.*, 2019, **809**, 151840.
- S6 C. Zhang, W. Fei, H. Wang, N. Li, D. Chen, Q. Xu, H. Li, J. He, and J. Lu, *J. Hazard. Mater.*, 2020, **399**, 123109.
- S7 J. Yang, J. Sun, S. Chen, D. Lan, Z. Li, Z. Li, J. Wei, Z. Yu, H. Zhu, S. Wang, and Y. Hou, *Sep. Purif. Technol.*, 2022, **290**, 120881.
- S8 Y. Zhang, F. Ma, M. Ling, H. Zheng, Y. Wu, and L. Li, *Chem. Eng. J.*, 2023, **464**, 142762.
- S9 J. Lu, Y. Chen, L. Li, X. Cai, S. Zhong, L. Wu, J. Chen, and S. Bai, *Chem. Eng. J.*, 2019, **362**, 1-11.
- S10 L. Ye, X. Jin, Y. Leng, Y. Su, H. Xie, and C. Liu, *J. Power Sources*, 2015, **293**, 409-415.
- S11 J. Osaki, M. Yoda, T. Takashima, and H. Irie, *RSC Advances*, 2019, **9**, 41913-41917.
